# Supplementary material
Source: publisher figshare collection journal article supplement (https://future-science-group.figshare.com/articles/dataset/_/18266486)
Supplement: Supplementary file 1 [file 1]

## Sheet: 1A P-value
Supplementary Table 1(A) - P value
CancerType	YTHDC1	YTHDC2	YTHDF1	YTHDF2	YTHDF3	IGF2BP1	IGF2BP2	IGF2BP3	HNRNPA2B1	HNRNPC	RBMX	METTL3	METTL14	WTAP	RBM15	RBM15B	VIRMA	ZC3H13	FTO	ALKBH5
BLCA	0.134299	0.70289	1.63e-06	0.00272994	0.0520179	2.57e-06	0.0493397	0.000180652	2.93e-08	0.00554047	0.28349	1.25e-05	0.0692976	0.13777	0.194558	0.0943333	0.13777	0.00177795	0.00381868	0.214766
BRCA	5.79e-05	0.546925	3.87e-36	0.0100846	0.688094	1.88e-21	3.79e-34	0.0129478	1.64e-41	7.49e-32	0.649429	0.217264	5.05e-11	8.58e-09	0.00036591	0.0659742	1.62e-07	6.28e-17	1.94e-38	0.44875
CHOL	2.71e-08	1.9e-06	2.26e-09	2.26e-09	0.000248166	0.000453785	5.98e-07	5.85e-05	2.26e-09	2.26e-09	2.26e-09	2.71e-08	0.13822	9.03e-09	3.11e-07	2.71e-08	2.26e-09	0.0221906	1.58e-08	0.000331729
COAD	0.00103885	0.665352	2.74e-24	4.08e-05	0.00729076	0.00077387	5.09e-06	2.42e-05	6.68e-16	5.17e-10	1.04e-21	5.76e-17	0.00350153	0.0131511	1.69e-07	0.000164261	9.05e-11	0.00035801	0.0171816	1.53e-05
ESCA	0.00460156	0.849512	2.43e-05	0.000864226	0.039182	0.00497274	0.00128467	5.04e-06	2.23e-06	3.91e-07	7.31e-05	7.7e-05	0.947919	0.00123003	0.00625431	0.385486	0.00625431	0.71127	0.0900318	0.0809852
GBM	0.263126	0.0161417	0.00140314	0.000762216	0.0576591	0.000199582	0.000565356	0.00014406	0.00848284	0.00014406	0.000179158	0.00612611	0.0613316	0.000179158	0.124578	0.0104752	0.00163999	0.00066795	0.000402678	0.0437923
HNSC	0.303487	0.0252306	3.42e-15	0.0447876	0.000268381	1.04e-20	3.11e-19	2.25e-11	1.69e-14	9.33e-14	4.81e-09	2.69e-10	0.0102074	1.55e-07	3.08e-15	0.178978	6.49e-17	0.508458	0.00459955	0.00276002
KICH	1.08e-09	0.0880634	0.112849	9.15e-09	0.0205652	2.72e-11	0.00123302	2.11e-05	3.32e-08	1.47e-12	1.68e-05	0.210316	0.161328	2.67e-12	0.000657332	0.0221295	0.526549	0.000317082	1.75e-11	1.8e-07
KIRC	0.625676	2.19e-11	0.756876	0.0099793	3.38e-05	0.178279	5.99e-23	3.73e-17	0.00429407	0.12654	3.53e-23	0.0025609	1.37e-05	2.53e-06	1e-08	3.51e-05	0.0124209	2.48e-11	1.45e-15	4.23e-11
KIRP	0.338801	0.420254	7.27e-06	3.87e-06	2.33e-08	0.0427142	2.03e-06	0.000493018	0.000949015	0.00528199	0.00909014	0.125358	2.28e-08	0.63926	0.199231	3.99e-06	1.88e-05	0.000197053	0.323815	0.00259415
LIHC	3.13e-05	1.38e-05	1.79e-20	2.46e-09	9.66e-09	2.86e-16	1.22e-07	1.66e-12	4.02e-23	1.48e-23	7.39e-25	7.37e-24	0.0618825	1.39e-06	3.27e-06	6.26e-23	5.59e-24	0.831176	2.86e-05	0.00087808
LUAD	0.45071	0.373962	5.67e-25	1.27e-08	0.0525521	2.89e-12	0.0254657	9.92e-14	3.53e-18	6.5e-28	8.9e-19	1.06e-08	8.57e-05	0.00126563	1.7e-10	9.26e-05	5.45e-11	3.81e-07	1.56e-10	0.234511
LUSC	0.135467	0.326838	2.34e-19	0.0156543	0.111645	3.69e-21	1.71e-17	6.36e-25	1.65e-21	4.69e-26	3.29e-18	0.000298223	8.48e-09	1.16e-05	2.15e-09	0.0806032	2.38e-12	5.41e-09	1.75e-13	0.0499884
PRAD	0.640964	0.00107566	3.56e-09	5.3e-09	0.667386	0.314954	9.24e-10	0.961536	3.36e-16	6.01e-07	3.81e-05	2.16e-15	0.049447	0.0683271	5.61e-05	4.73e-16	0.312473	1.22e-10	9.69e-11	0.0147715
READ	0.686613	0.114364	1.51e-07	0.107257	0.0251132	0.000683479	0.051488	0.816588	0.000880612	0.414247	6.34e-05	2.04e-05	0.00533514	0.866291	0.027252	0.00554803	0.0247033	0.166997	0.399868	0.000319032
STAD	0.000150039	0.000230522	2.91e-17	3.83e-11	1.15e-07	3.78e-09	6.87e-13	3.05e-12	7.11e-17	1.8e-10	4.25e-11	2.7e-08	0.0287933	4.14e-08	4.14e-13	0.00175538	4.81e-12	5.99e-05	0.119855	0.6857
THCA	4.86e-19	1.78e-06	2.2e-06	0.904227	3.18e-08	2.35e-07	1.78e-24	1.57e-10	1.03e-09	5.79e-05	0.141661	8.14e-05	1.92e-19	1.74e-09	8.64e-24	0.00382303	3.87e-08	2.1e-13	6.69e-16	4.24e-08
UCEC	4.66e-12	0.53288	9.68e-10	1.58e-08	9.61e-07	1.04e-05	0.729175	3.83e-13	7.46e-07	0.881925	8.96e-05	0.00722129	1.3e-15	0.000559906	0.000301666	0.0318595	6.41e-06	1.29e-09	2.38e-15	0.000842191

## Sheet: 1B Log(Fold Change)
Supplementary Table 1(B) - Log(FoldChange)
CancerType	YTHDC1	YTHDC2	YTHDF1	YTHDF2	YTHDF3	IGF2BP1	IGF2BP2	IGF2BP3	HNRNPA2B1	HNRNPC	RBMX	METTL3	METTL14	WTAP	RBM15	RBM15B	VIRMA	ZC3H13	FTO	ALKBH5
BLCA	-0.124785	-0.0125367	0.575938	0.364546	-0.165527	0.459431	1.02483	0.609962	0.621071	0.252545	0.114464	0.546461	-0.122987	-0.152412	0.138332	0.179809	0.177383	-0.418697	-0.282158	-0.102805
BRCA	-0.140971	0.0289483	0.53256	0.123784	0.0320886	0.0724539	-0.752058	0.0936535	0.561149	0.481071	0.0274583	-0.0435987	-0.250508	-0.202394	0.141647	0.076443	0.325361	-0.412355	-0.920837	-0.00626623
CHOL	1.16351	0.784494	1.3053	0.859238	0.604672	0.774832	2.07459	0.560296	1.27795	1.38277	1.90668	1.10852	0.189864	1.0699	0.687385	1.30086	1.07425	0.495988	0.915002	0.453951
COAD	0.114442	-0.0483223	1.02558	0.154603	-0.16085	0.313129	0.401741	0.439903	0.593899	0.435347	0.737595	0.591789	-0.134544	0.0867506	0.301515	0.171009	0.366769	0.311464	0.11186	-0.266024
ESCA	0.276936	0.0415005	0.732667	0.46864	0.250159	0.511564	1.20868	1.42062	0.889929	0.944762	0.569069	0.421941	0.0155784	0.411513	0.409077	0.0843743	0.31574	0.0320169	0.214193	0.206499
GBM	-0.153706	-0.31733	0.528151	0.480923	0.198795	0.117125	1.64673	1.18874	0.574197	1.00379	1.2087	0.582951	0.190571	1.21758	0.174803	0.419451	0.411589	-0.825365	-0.658355	-0.296206
HNSC	0.0780903	-0.135819	0.495435	0.129443	0.253492	0.722725	2.19585	0.92694	0.591329	0.510422	0.370926	0.474863	0.130128	0.317779	0.434656	-0.034192	0.567897	0.0435747	0.168545	0.236644
KICH	-0.658241	-0.155312	0.0782026	-0.514876	0.177788	-0.361876	0.363015	0.229269	-0.466764	-1.05158	-0.366982	-0.076238	-0.116602	-1.0417	-0.195568	0.215964	-0.0488769	-0.44854	-0.792833	-0.521289
KIRC	-0.0368486	0.302871	0.0112373	-0.102104	-0.211814	0.0184424	-1.07604	0.23577	-0.127755	-0.0895678	0.490509	0.181054	-0.190122	0.18283	0.192303	-0.159235	0.0814288	-0.3702	0.432568	0.204984
KIRP	0.0304835	-0.0658518	0.265866	-0.259206	-0.435179	-0.0814861	0.66992	0.147734	0.222285	0.137435	0.151759	0.172355	-0.295374	0.0188585	-0.0572408	0.305504	-0.235194	-0.333601	0.0513212	-0.191995
LIHC	0.263361	0.249991	0.654926	0.388306	0.425955	0.949496	1.12837	0.407372	0.797959	0.776605	0.973618	0.859386	0.0955665	0.373884	0.241003	0.777816	0.85318	0.00890123	0.245565	0.232738
LUAD	0.055851	0.0708653	0.596334	0.225999	0.115227	0.47152	0.354289	0.913895	0.493353	0.634585	0.400902	0.396275	-0.12628	-0.156292	0.298064	0.161114	0.353699	-0.296815	-0.413548	-0.057073
LUSC	0.0808051	-0.050002	0.532746	0.131679	0.0773768	0.944032	1.91646	1.69227	0.66889	0.736336	0.490813	0.268389	-0.247152	0.241919	0.24954	0.0899237	0.378275	-0.378126	-0.429224	0.157978
PRAD	-0.038716	0.163626	0.212092	0.187755	-0.0166175	0.0076016	-0.358314	0.00500139	0.400496	0.197027	0.205732	0.477657	-0.0946538	0.160367	0.164588	0.402844	-0.0352189	-0.499582	-0.388072	-0.0916005
READ	-0.00453779	-0.184511	1.15961	0.124557	-0.305052	0.481392	0.368285	0.354884	0.437952	0.0184204	0.483035	0.574069	-0.311895	-0.0892512	0.239583	0.322373	0.223851	0.212238	-0.0968632	-0.461809
STAD	0.230584	0.292591	0.927752	0.448341	0.407945	0.647017	1.68034	1.00326	0.871353	0.481416	0.490163	0.444712	0.140153	0.328526	0.625834	0.235856	0.580038	0.513368	0.120463	0.059527
THCA	-0.389755	-0.187071	-0.126519	-0.0112304	-0.233355	0.00436827	1.38004	-0.0309235	-0.233998	0.113796	-0.0708633	-0.19508	-0.337375	-0.241563	-0.370034	0.0727784	-0.186089	-0.371572	-0.336509	-0.174835
UCEC	-0.491531	0.0581634	0.339172	0.372236	-0.414131	0.281281	-0.0393848	0.628693	0.386983	0.0095355	-0.317938	0.163564	-0.585779	-0.23769	0.230623	0.12832	-0.300765	-0.52141	-0.666605	-0.28026
